# Supplementary material for: Bio-inspired synthesis of titania with polyamine induced morphology and phase transformation at room-temperature: Insight into the role of the protonated amino group
Source: Royal Society of Chemistry journal article supplement (doi:10.1039/c3dt50359c), 2013-01-01
Supplement: c3dt50359c.pdf [file c3dt50359c.pdf]

*Electronic Supplementary Information For*

Bio-inspired synthesis of titania with polyamine induced the  
morphology and phase transformation at room-temperature: insight  
into the role of protonated amino group

*Yong Yan, Bo Hao, Xiaobo Wang and Ge Chen<sup>\*</sup>*

College of Environmental & Energy Engineering, Beijing University of Technology,  
Pingleyuan 100, 100124, Beijing, P.R. China.

**Table S1.** Syntheses conditions, precipitate weight, yield, morphology, main phase, crystallite size, and BET surface areas of samples

Sample 1: PAH-mediated precipitates from  $\text{Ti}(\text{SO}_4)_2$  solution

| Polymer | Ti precursor               | Reaction time/day | pH value of solution | Precipitate weight/g | Yield <sup>d</sup> | Morphology     | Main phase           | Crystallite size/nm              | $S_{\text{BET}}/\text{m}^2\text{g}^{-1}$ |
|---------|----------------------------|-------------------|----------------------|----------------------|--------------------|----------------|----------------------|----------------------------------|------------------------------------------|
| PAH     | $\text{Ti}(\text{SO}_4)_2$ | 5                 | 1.31                 | 0.0182               | 5.3%               | Solid spheres  | — <sup>e</sup>       |                                  | 57.6                                     |
| PAH     | $\text{Ti}(\text{SO}_4)_2$ | 15                | 1.24                 | 0.0447               | 18.1%              | Solid spheres  | A <sup>a</sup>       | $A_{101}^f=2.9$                  | 98.1                                     |
| PAH     | $\text{Ti}(\text{SO}_4)_2$ | 30                | 1.19                 | 0.0840               | 40.5%              | Hollow spheres | A                    | $A_{101}=3.1$                    | 116.6                                    |
| PAH     | $\text{Ti}(\text{SO}_4)_2$ | 60                | 1.11                 | 0.0868               | 42.6%              | Hollow spheres | A and R <sup>b</sup> | $A_{101}=2.9$<br>$R_{110}^g=4.3$ | 129.8                                    |
| PAH     | $\text{Ti}(\text{SO}_4)_2$ | 120               | 1.10                 | 0.0871               | 43.5%              | Hollow spheres | A and R              | $A_{101}=2.8$<br>$R_{110}=4.4$   | 138.4                                    |

Sample 2: PDDA-mediated precipitates from  $\text{Ti}(\text{SO}_4)_2$  solution

| Polymer | Ti precursor               | Reaction time/day | pH value of solution | Precipitate weight/g | Yield | Morphology               | Main phase | Crystallite size/nm | $S_{\text{BET}}/\text{m}^2\text{g}^{-1}$ |
|---------|----------------------------|-------------------|----------------------|----------------------|-------|--------------------------|------------|---------------------|------------------------------------------|
| PDDA    | $\text{Ti}(\text{SO}_4)_2$ | 5                 | 1.27                 | 0.0242               | 8.7%  | Aggregated nanoparticles | —          |                     | 9.1                                      |
| PDDA    | $\text{Ti}(\text{SO}_4)_2$ | 15                | 1.20                 | 0.0621               | 23.5% | Aggregated nanoparticles | —          |                     | 12.4                                     |
| PDDA    | $\text{Ti}(\text{SO}_4)_2$ | 30                | 1.19                 | 0.0628               | 28.9% | Aggregated nanoparticles | A          | $A_{101}=3.0$       | 13.0                                     |
| PDDA    | $\text{Ti}(\text{SO}_4)_2$ | 60                | 1.08                 | 0.0669               | 32.3% | Aggregated nanoparticles | A          | $A_{101}=3.2$       | 18.9                                     |

### Sample 3: PAH-mediated precipitates from Ti-BALDH solution

| Polymer | Ti precursor | Reaction time/day | pH value of solution | Precipitate weight/g | Yield | Morphology               | Main phase | Crystallite size/nm | $S_{\text{BET}}/\text{m}^2\text{g}^{-1}$ |
|---------|--------------|-------------------|----------------------|----------------------|-------|--------------------------|------------|---------------------|------------------------------------------|
| PAH     | Ti-BALDH     | 5                 | 6.38                 | 0.0341               | 15.8% | Aggregated nanoparticles | A          | $A_{101}=2.8$       | 7.1                                      |
| PAH     | Ti-BALDH     | 15                | 5.92                 | 0.0342               | 14.8% | Aggregated nanoparticles | A          | $A_{101}=2.8$       | 9.1                                      |
| PAH     | Ti-BALDH     | 30                | 5.88                 | 0.0328               | 15.3% | Aggregated nanoparticles | A          | $A_{101}=2.9$       | 8.8                                      |
| PAH     | Ti-BALDH     | 60                | 5.88                 | 0.0344               | 15.1% | Aggregated nanoparticles | A          | $A_{101}=2.8$       | 9.6                                      |

### Sample 4: PDDA-mediated precipitates from Ti-BALDH solution

| Polymer | Ti precursor | Reaction time/day | pH value of solution | Precipitate weight/g | Yield | Morphology     | Main phase           | Crystallite size/nm                       | $S_{\text{BET}}/\text{m}^2\text{g}^{-1}$ |
|---------|--------------|-------------------|----------------------|----------------------|-------|----------------|----------------------|-------------------------------------------|------------------------------------------|
| PDDA    | Ti-BALDH     | 5                 | 6.44                 | 0.0488               | 24.4% | Hollow spheres | A and B <sup>c</sup> | $A_{101}=3.0$<br>$B_{110}^{\text{h}}=3.3$ | 23.9                                     |
| PDDA    | Ti-BALDH     | 15                | 6.04                 | 0.0576               | 27.4% | Hollow spheres | A and B              | $A_{101}=2.9$<br>$B_{110}=3.2$            | 27.1                                     |
| PDDA    | Ti-BALDH     | 30                | 6.03                 | 0.0580               | 28.6% | Hollow spheres | A and B              | $A_{101}=2.9$<br>$B_{110}=3.2$            | 24.4                                     |
| PDDA    | Ti-BALDH     | 60                | 6.01                 | 0.0581               | 27.1% | Hollow spheres | A and B              | $A_{101}=2.8$<br>$B_{110}=3.3$            | 26.0                                     |

[a] A is anatase phase; [b] R is rutile phase; [c] B is  $\text{TiO}_2\text{-B}$ ; [d] Yield is weight percentage of the obtained  $\text{TiO}_2$  (after removal of organic and water components) to theoretical  $\text{TiO}_2$  production; [e] — is amorphous; [f]  $A_{101}$  is crystallite size of anatase in [101] direction; [g]  $R_{110}$  is crystallite size of rutile in [110] direction; [h]  $B_{110}$  is crystallite size of  $\text{TiO}_2\text{-B}$  in [110] direction; (the crystallite size of titania were calculated by Scherrer equation using XRD pattern) [i]  $S_{\text{BET}}$  is Brunauer-Emmett-Teller (BET) surface areas of  $\text{TiO}_2$ .

**Table S2.** XPS results of atomic content of four samples: sample 1,  
2, 3, and 4

| Signal | Atomic content |          |          |          |
|--------|----------------|----------|----------|----------|
|        | Sample 1       | Sample 2 | Sample 3 | Sample 4 |
| O 1s   | 52.61%         | 40.41%   | 39.57%   | 40.61%   |
| N 1s   | 2.76%          | 2.45%    | 3.32%    | 2.73%    |
| C 1s   | 24.64%         | 41.79%   | 44.68%   | 43.05%   |
| S 2p   | 3.86%          | 4.38%    | –        | –        |
| Ti 2p  | 16.13%         | 10.79%   | 12.42%   | 13.96%   |

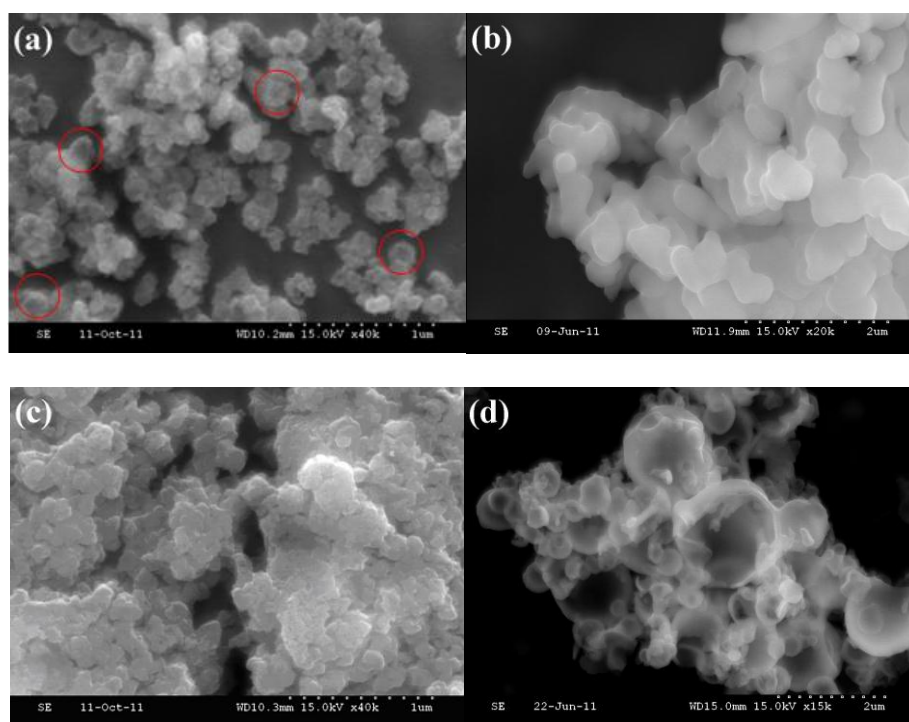

**Figure S1.** SEM images of four samples: a) sample 1, b) sample 2, c) sample 3, and d) sample 4. (Some fractions of hollow structure in sample 1 are showed by red circles in Fig. S1a)

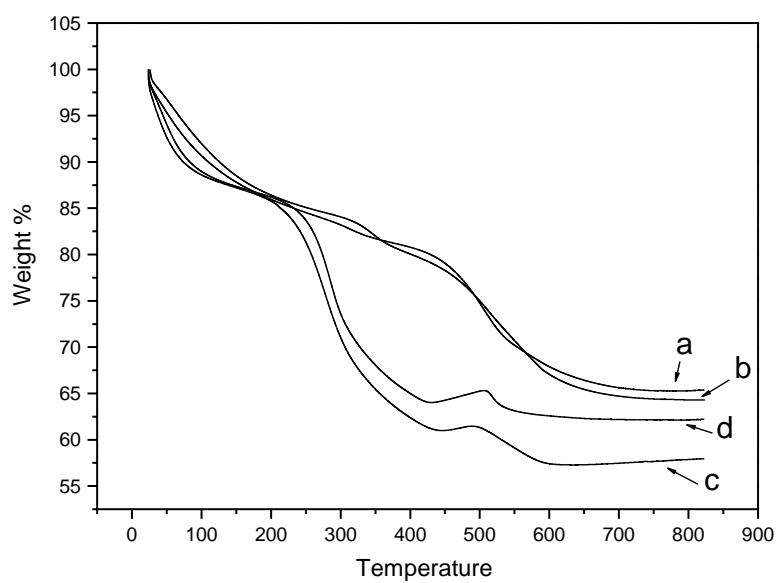

**Figure S2.** TGA scan of four samples: a) sample 1, b) sample 2, c) sample 3, and d) sample 4.

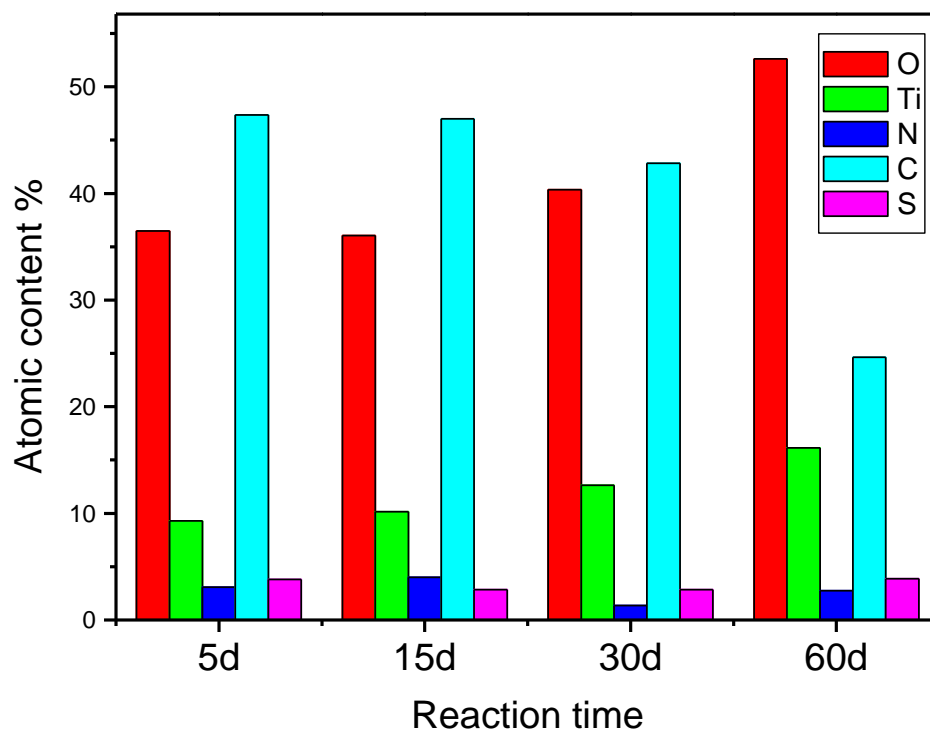

**Figure S3.** XPS measurements of the atomic content of the precipitates mediated by PAH from  $\text{Ti}(\text{SO}_4)_2$  solution after different reaction time: 5d, 15d, 30d
